# Supplementary material for: Meta-analysis reveals an extreme “decline effect” in the impacts of ocean acidification on fish behavior
Source: PLoS Biol. 2022 Feb 3;20(2):e3001511. doi: 10.1371/journal.pbio.3001511 (PMC8812914; doi:10.1371/journal.pbio.3001511)
Supplement: S10 Data — Data file for analysis in R. This dataset applies to the analysis titled “##### CREATE SCATTERPLOT FIGURE TO VISUALIZE MEAN EFFECT SIZE MAGNITUDE FOR EACH OBSERVATION OVER TIME (Fig 1A)” in S1 Code. (CSV) [file pbio.3001511.s011.csv]

obs	study	year.print	year.online	ctrl.n	lnrr.mag
1	a1	2009	2009	26	0.257101337
2	a1	2009	2009	20	4.670211454
3	a1	2009	2009	20	0.431835618
4	a1	2009	2009	10	0.113096385
5	a1	2009	2009	30	4.695463817
6	a1	2009	2009	30	0.093852588
7	a1	2009	2009	30	0.663291165
8	a2	2010	2009	45	0.195111616
9	a2	2010	2009	45	0.050189745
10	a2	2010	2009	45	0.032344437
11	a2	2010	2009	45	2.084774475
12	a2	2010	2009	45	0
13	a2	2010	2009	45	0.162707948
14	a2	2010	2009	45	13.81550956
15	a2	2010	2009	45	13.81550956
16	a2	2010	2009	45	0.687760708
17	a2	2010	2009	45	0.677056319
18	a2	2010	2009	45	13.10635594
19	a2	2010	2009	45	13.10635594
20	a3	2010	2010	22	0.186650604
21	a3	2010	2010	22	0.17516657
22	a3	2010	2010	22	0.440288814
23	a3	2010	2010	22	0.083326653
24	a3	2010	2010	22	0.282193053
25	a3	2010	2010	22	1.961284112
26	a3	2010	2010	22	0.064582411
27	a3	2010	2010	22	0.659266817
28	a3	2010	2010	22	1.98638698
29	a3	2010	2010	20	0.191118509
30	a3	2010	2010	20	1.521503789
31	a3	2010	2010	20	2.211763784
32	a3	2010	2010	20	0.066001899
33	a3	2010	2010	20	0.945623496
34	a3	2010	2010	20	1.996269556
35	a3	2010	2010	22	0.08218464
36	a3	2010	2010	22	1.462306889
37	a3	2010	2010	22	2.20308632
38	a3	2010	2010	18	0
39	a3	2010	2010	18	12.98411229
40	a3	2010	2010	18	13.80020401
41	a3	2010	2010	25	0
42	a3	2010	2010	25	13.00215991
43	a3	2010	2010	25	13.75081202
44	a3	2010	2010	10	0
45	a3	2010	2010	10	0
46	a3	2010	2010	10	8.635864721
47	a3	2010	2010	10	0
48	a3	2010	2010	10	11.201497
49	a3	2010	2010	10	13.58530463
50	a3	2010	2010	10	0
51	a3	2010	2010	10	11.72755286
52	a3	2010	2010	10	13.67024198
53	a3	2010	2010	10	0
54	a3	2010	2010	10	13.08542965
55	a3	2010	2010	10	13.70031293
56	a3	2010	2010	10	0.693147181
57	a3	2010	2010	10	0.356624233
58	a3	2010	2010	10	0.154319727
59	a3	2010	2010	10	0.492261339
60	a3	2010	2010	10	0.492261339
61	a3	2010	2010	10	3.319002922
62	a3	2010	2010	17	1.189517921
63	a3	2010	2010	17	3.465656665
64	a3	2010	2010	17	3.840901675
65	a3	2010	2010	20	0.902467824
66	a3	2010	2010	20	3.355556101
67	a3	2010	2010	20	4.010330303
68	a4	2011	2011	10	0.393670532
69	a4	2011	2011	10	0.359099188
70	a4	2011	2011	10	0.024100103
71	a4	2011	2011	10	0.655875424
72	a4	2011	2011	9	0.888322268
73	a4	2011	2011	9	0.48285716
74	a4	2011	2011	10	0.239674073
75	a4	2011	2011	10	0.504556754
76	a4	2011	2011	9	0.955567949
77	a4	2011	2011	9	0.013887489
78	a5	2011	2011	18	0.259977505
79	a5	2011	2011	18	0.255159279
80	a5	2011	2011	18	0.421716275
81	a5	2011	2011	18	0.305351725
82	a5	2011	2011	20	1.688279851
83	a5	2011	2011	20	0.535819206
84	a5	2011	2011	20	1.25176144
85	a5	2011	2011	20	0.908889632
86	a6	2011	2011	20	0.364251801
87	a6	2011	2011	20	0.552789823
88	a6	2011	2011	20	0.807260487
90	a6	2011	2011	20	0.813928719
92	a6	2011	2011	20	3.164067588
94	a7	2011	2011	30	0.752918924
95	a7	2011	2011	30	0.848849451
96	a7	2011	2011	30	0.77985658
97	a8	2012	2011	27	0.506181935
98	a8	2012	2011	27	0.506181935
99	a8	2012	2011	27	0.389238926
100	a9	2012	2011	15	0.179046914
101	a9	2012	2011	15	0.183106917
102	a9	2012	2011	15	0.117781138
103	a9	2012	2011	15	0.047405482
104	a9	2012	2011	15	0.205251783
105	a9	2012	2011	15	0.426330512
106	a9	2012	2011	15	0.04976151
107	a9	2012	2011	15	0.134919318
108	a9	2012	2011	15	0.072570693
109	a9	2012	2011	15	0.235722334
110	a9	2012	2011	15	0.267479365
111	a9	2012	2011	15	0.074107972
112	a9	2012	2011	15	0.087015594
113	a9	2012	2011	15	0.165796057
114	a9	2012	2011	15	0.106956505
115	a9	2012	2011	15	0.591359676
116	a9	2012	2011	15	0.052661093
117	a9	2012	2011	15	0.280917123
118	a10	2012	2011	70	0.475008767
119	a11	2012	2012	16	2.944832654
120	a11	2012	2012	16	1.458522273
122	a11	2012	2012	16	3.329091263
123	a11	2012	2012	16	1.896835854
124	a11	2012	2012	16	1.385978655
125	a11	2012	2012	16	0.559768022
126	a11	2012	2012	16	3.599000925
131	a11	2012	2012	17	0.613086206
132	a11	2012	2012	17	2.46833142
133	a11	2012	2012	17	0.470573592
134	a11	2012	2012	17	2.236199046
135	a11	2012	2012	17	0.15415068
136	a11	2012	2012	17	0.613104473
138	a11	2012	2012	17	2.987364024
139	a11	2012	2012	17	0.693147181
140	a11	2012	2012	17	2.034590976
143	a11	2012	2012	23	0.105398844
144	a11	2012	2012	23	1.252699375
145	a11	2012	2012	23	0.459359525
146	a11	2012	2012	23	0.765789114
147	a11	2012	2012	23	0.223840173
148	a11	2012	2012	23	2.31595683
149	a11	2012	2012	15	0.336356368
150	a11	2012	2012	15	1.675195273
151	a11	2012	2012	15	0.068399316
152	a11	2012	2012	15	0.961638552
153	a11	2012	2012	15	1.032781488
154	a11	2012	2012	15	0.318444214
156	a11	2012	2012	15	1.529479094
157	a11	2012	2012	15	0.544820629
158	a12	2012	2012	25	0.016755914
159	a12	2012	2012	25	0.045569549
160	a12	2012	2012	25	0.514930299
161	a12	2012	2012	25	0.088986311
162	a12	2012	2012	25	0.199252399
163	a12	2012	2012	25	6.306275287
164	a12	2012	2012	25	0.00643089
165	a12	2012	2012	25	0.083510633
166	a12	2012	2012	25	1.625698433
167	a12	2012	2012	25	0.135942583
168	a12	2012	2012	25	0.022381189
169	a12	2012	2012	25	0.271235852
170	a13	2012	2012	30	0.051293294
171	a13	2012	2012	30	0.105360516
172	a13	2012	2012	30	0.105360516
173	a13	2012	2012	30	0.059898142
174	a13	2012	2012	30	0.048202102
175	a13	2012	2012	30	0.048202102
176	a14	2012	2012	9	4.465110953
177	a14	2012	2012	14	1.994444762
178	a14	2012	2012	15	0.284311859
179	a15	2012	2012	30	0.368542065
180	a15	2012	2012	30	0.282210764
181	a15	2012	2012	30	0.061558852
182	a15	2012	2012	30	0.17933787
183	a15	2012	2012	30	0.046154513
184	a15	2012	2012	30	0.05667522
185	a16	2012	2012	22	0.141728331
186	a17	2013	2013	19	0.333144447
187	a17	2013	2013	17	0.088831214
188	a17	2013	2013	17	0.579033874
189	a17	2013	2013	21	0.41945135
190	a17	2013	2013	17	0.12095261
191	a18	2013	2012	60	0.073616746
192	a18	2013	2012	60	0.051455174
193	a18	2013	2012	60	0.067972984
194	a18	2013	2012	60	0.028987537
195	a18	2013	2012	60	0.111536098
196	a18	2013	2012	60	0.024033199
197	a18	2013	2012	60	0.050593482
198	a18	2013	2012	60	0.168440117
199	a18	2013	2012	60	0.064919546
200	a18	2013	2012	60	0.188052232
201	a18	2013	2012	60	0.142139767
202	a18	2013	2012	60	0.1537341
203	a19	2013	2013	14	0.557486588
204	a19	2013	2013	7	0.484909461
205	a20	2013	2013	19	0.047874763
206	a20	2013	2013	19	0.012859748
207	a21	2013	2013	20	0.661563495
208	a21	2013	2013	25	1.245563012
209	a21	2013	2013	20	1.592670879
210	a21	2013	2013	20	0.279366533
211	a21	2013	2013	20	1.779991433
212	a22	2013	2013	29	2.117288
213	a22	2013	2013	29	1.178769629
214	a22	2013	2013	29	0.318860098
215	a22	2013	2013	29	2.657837919
216	a22	2013	2013	29	1.050046064
217	a22	2013	2013	29	0.117238759
218	a22	2013	2013	29	2.525594856
219	a22	2013	2013	29	0.78882239
220	a22	2013	2013	29	9.707472669
221	a22	2013	2013	29	0.158612828
222	a22	2013	2013	29	2.397179197
224	a22	2013	2013	29	0.159292266
225	a22	2013	2013	29	1.041415251
226	a22	2013	2013	29	0.302290948
227	a22	2013	2013	29	0.940554924
230	a22	2013	2013	29	2.148199864
231	a22	2013	2013	29	0.147434419
232	a22	2013	2013	29	0.336459935
233	a22	2013	2013	29	2.538576947
234	a22	2013	2013	29	0.167062876
235	a22	2013	2013	29	0.426631828
236	a22	2013	2013	29	2.707963051
237	a22	2013	2013	29	0.959261535
238	a22	2013	2013	29	0.916300392
239	a22	2013	2013	15	8.431635303
240	a22	2013	2013	15	2.500605559
241	a22	2013	2013	15	1.937941979
242	a23	2013	2013	29	0.138583068
243	a23	2013	2013	29	1.317317306
244	a23	2013	2013	55	0.23255855
245	a23	2013	2013	55	0.487382231
246	a24	2013	2012	20	0.489475733
247	a24	2013	2012	20	2.018321462
248	a24	2013	2012	20	2.683108226
249	a24	2013	2012	20	0.164369069
250	a24	2013	2012	20	1.637642074
251	a24	2013	2012	20	2.291852321
252	a24	2013	2012	10	0.062793313
253	a24	2013	2012	10	0.701885285
254	a24	2013	2012	10	2.179924578
255	a24	2013	2012	10	0.693147181
256	a24	2013	2012	10	2.197202216
257	a24	2013	2012	10	4.166566935
258	a24	2013	2012	10	0.784115517
259	a24	2013	2012	10	1.560608165
260	a24	2013	2012	10	1.751235395
261	a24	2013	2012	10	0.068992623
262	a24	2013	2012	10	0.336470747
263	a24	2013	2012	10	1.673975192
264	a25	2014	2014	45	0.316625374
265	a25	2014	2014	45	0.105344516
266	a25	2014	2014	45	0.306730267
267	a25	2014	2014	45	0.0907921
268	a25	2014	2014	45	0.304066928
269	a25	2014	2014	45	0.066056466
270	a25	2014	2014	45	0.440668743
271	a25	2014	2014	45	0.219481502
272	a25	2014	2014	46	0.025329808
273	a25	2014	2014	46	0.078466173
274	a26	2014	2014	60	0.153206244
275	a26	2014	2014	60	0.256977226
276	a26	2014	2014	60	0.155335514
277	a26	2014	2014	60	0.235205346
280	a27	2014	2013	14	1.391543717
281	a27	2014	2013	14	1.731007807
283	a27	2014	2013	14	0.716677678
284	a27	2014	2013	14	1.959214115
285	a27	2014	2013	14	3.306363279
286	a28	2014	2014	58	0.126568695
287	a29	2014	2014	7	0.733141666
288	a29	2014	2014	6	0.736531279
289	a30	2014	2013	15	0.494871686
290	a30	2014	2013	7	0.525710524
291	a31	2014	2014	10	13.79283541
292	a31	2014	2014	20	13.71660693
293	a31	2014	2014	10	13.76019867
294	a31	2014	2014	10	13.80196929
295	a31	2014	2014	10	0.660000025
296	a31	2014	2014	20	0.620124754
297	a31	2014	2014	10	0.618477238
298	a31	2014	2014	10	0.590115337
299	a31	2014	2014	10	0.629120528
300	a31	2014	2014	20	0.613093723
301	a31	2014	2014	10	0.572518692
302	a31	2014	2014	10	0.604020841
303	a31	2014	2014	10	2.351336091
304	a31	2014	2014	10	2.631080387
305	a31	2014	2014	10	13.64587223
306	a31	2014	2014	10	13.59414043
307	a31	2014	2014	10	1.168579279
308	a31	2014	2014	10	1.540465994
309	a31	2014	2014	10	2.248164094
310	a31	2014	2014	10	1.636235372
311	a31	2014	2014	10	0.802736715
312	a31	2014	2014	10	0.734912
313	a31	2014	2014	10	0.923399271
314	a31	2014	2014	10	1.14973016
315	a31	2014	2014	10	1.493515609
316	a31	2014	2014	10	1.609602373
317	a31	2014	2014	10	1.664519995
318	a31	2014	2014	10	2.140000874
319	a32	2014	2014	10	0.682237981
320	a32	2014	2014	10	0.673984262
321	a32	2014	2014	10	0.984168154
322	a33	2014	2014	148	1.618755208
323	a33	2014	2014	148	1.963591875
324	a33	2014	2014	160	1.579810844
325	a33	2014	2014	160	1.903339619
326	a33	2014	2014	62	1.526948716
327	a33	2014	2014	62	1.903339619
328	a33	2014	2014	225	0.489109812
329	a33	2014	2014	225	0.652555326
330	a33	2014	2014	245	0.475932697
331	a33	2014	2014	245	0.565559822
332	a33	2014	2014	105	0.350774249
333	a33	2014	2014	105	0.42486958
334	a34	2015	2015	5	0.029766355
335	a34	2015	2015	5	0.530634465
336	a34	2015	2015	5	0
337	a34	2015	2015	5	0.747288528
341	a34	2015	2015	5	0.150276892
342	a34	2015	2015	5	0.916290732
343	a34	2015	2015	5	0.336452117
344	a34	2015	2015	5	1.04806001
345	a34	2015	2015	5	1.609437912
346	a34	2015	2015	5	0
347	a34	2015	2015	5	0.810578166
348	a34	2015	2015	5	0.734754332
349	a34	2015	2015	5	0.592002659
350	a34	2015	2015	5	1.491690087
351	a34	2015	2015	5	0.693569746
352	a35	2015	2014	8	0.012270093
353	a35	2015	2014	8	1.561235811
354	a35	2015	2014	8	0.299519918
355	a35	2015	2014	8	0.031242796
356	a35	2015	2014	8	0.115792514
357	a35	2015	2014	8	0.421205259
358	a35	2015	2014	8	0.171072425
359	a35	2015	2014	8	0
360	a35	2015	2014	8	0.944461609
361	a35	2015	2014	8	2.890371758
362	a35	2015	2014	8	1.08088508
363	a35	2015	2014	8	1.583048787
364	a35	2015	2014	8	3.079860915
365	a35	2015	2014	8	4.466155276
366	a35	2015	2014	8	2.552573741
367	a35	2015	2014	8	2.397262295
368	a35	2015	2014	8	0.034491766
369	a35	2015	2014	8	0.950790744
370	a35	2015	2014	8	0.21499977
371	a35	2015	2014	8	2.381498681
372	a36	2015	2015	6	1.394407059
373	a36	2015	2015	6	0.268890071
374	a36	2015	2015	6	0.083389122
375	a36	2015	2015	6	0.533277534
376	a36	2015	2015	6	0.868955998
377	a36	2015	2015	6	1.440365793
378	a36	2015	2015	6	0.086070897
379	a37	2015	2014	18	0
380	a37	2015	2014	16	0.906721281
381	a37	2015	2014	16	0.824339391
382	a38	2016	2015	11	0.296147742
383	a38	2016	2015	11	0.085371618
384	a38	2016	2015	11	0.069602215
385	a38	2016	2015	11	0.493992246
386	a38	2016	2015	11	0.060503534
387	a38	2016	2015	11	0.2071807
388	a38	2016	2015	10	0.29171244
389	a38	2016	2015	10	0.12965862
390	a38	2016	2015	10	0.008185585
391	a38	2016	2015	10	0.016941615
392	a38	2016	2015	10	0.029262788
393	a38	2016	2015	10	0.171064402
394	a39	2015	2015	22	0.222532055
395	a39	2015	2015	22	0.123059575
396	a39	2015	2015	21	0.206431265
397	a40	2015	2015	12	0.851336043
398	a40	2015	2015	11	0.783278623
399	a41	2015	2015	19	0
400	a41	2015	2015	19	0
401	a41	2015	2015	20	0.177272188
402	a41	2015	2015	20	0.038108269
403	a41	2015	2015	43	0.087421186
404	a41	2015	2015	43	0.006138072
405	a41	2015	2015	19	0.291910409
406	a41	2015	2015	19	0
407	a41	2015	2015	25	0.13186595
408	a41	2015	2015	25	0.233386044
409	a42	2015	2015	15	0.187342821
410	a42	2015	2015	15	0.717620718
411	a42	2015	2015	14	1.014881396
412	a42	2015	2015	14	0.641003184
413	a42	2015	2015	14	1.543831547
414	a42	2015	2015	15	0.467985465
415	a42	2015	2015	15	0.30538165
416	a42	2015	2015	15	0.040341605
417	a42	2015	2015	15	0.267830304
418	a42	2015	2015	15	0.485507816
419	a42	2015	2015	15	0.820980552
420	a42	2015	2015	15	0.350202429
421	a42	2015	2015	15	0.17979311
422	a42	2015	2015	14	1.30833282
423	a42	2015	2015	14	0.165985137
424	a42	2015	2015	14	0.197428745
425	a42	2015	2015	14	0.190353728
426	a42	2015	2015	14	0.634306681
427	a42	2015	2015	14	0.967149149
428	a42	2015	2015	14	0.303380982
429	a42	2015	2015	14	0.027779564
430	a43	2015	2015	4	0.138733416
431	a43	2015	2015	7	1.596449635
432	a44	2015	2015	36	0.012089352
433	a44	2015	2015	36	0.611970052
434	a44	2015	2015	36	0.068420915
435	a44	2015	2015	36	0.039734177
436	a44	2015	2015	36	0.111572851
437	a44	2015	2015	36	0.250402019
438	a44	2015	2015	36	0.249818542
439	a44	2015	2015	36	0.094474708
440	a44	2015	2015	36	0.182527551
441	a44	2015	2015	36	0.040199453
442	a44	2015	2015	28	0.258632699
443	a44	2015	2015	28	1.254844629
444	a45	2016	2016	90	0.148071634
445	a46	2016	2016	20	1.246168609
446	a47	2016	2016	12	0.287953185
447	a47	2016	2016	12	0.02626986
448	a47	2016	2016	12	0.317525025
449	a47	2016	2016	12	0.082258609
450	a47	2016	2016	12	0.340000232
451	a47	2016	2016	12	0.052577816
452	a47	2016	2016	31	0.603370983
453	a47	2016	2016	15	0.374693449
454	a47	2016	2016	15	0.257305312
455	a47	2016	2016	7	0.496758367
456	a48	2016	2016	14	0.289293065
457	a48	2016	2016	7	0.274201599
458	a49	2016	2016	16	2.191609307
459	a49	2016	2016	26	0.523248144
460	a49	2016	2016	26	0.134850944
461	a49	2016	2016	26	0.105360516
462	a49	2016	2016	26	0.139677842
463	a50	2016	2015	30	0.223143551
464	a50	2016	2015	30	0.148420005
465	a51	2016	2016	18	0.297375202
466	a51	2016	2016	18	0.210363825
467	a51	2016	2016	18	0.353752907
468	a51	2016	2016	18	0.274330739
469	a51	2016	2016	18	0.019245404
470	a51	2016	2016	18	0.080842599
471	a51	2016	2016	10	0.80337246
472	a51	2016	2016	10	0.753011162
473	a51	2016	2016	10	0.054665589
474	a51	2016	2016	10	0.233009411
475	a52	2016	2015	73	0.06783633
476	a52	2016	2015	73	0.203086468
477	a52	2016	2015	73	0.123047895
478	a52	2016	2015	73	0.103277586
479	a52	2016	2015	73	0.748199687
480	a52	2016	2015	73	0.782913767
481	a52	2016	2015	107	0.273539665
482	a52	2016	2015	107	0.517837791
483	a52	2016	2015	107	0.011233627
484	a52	2016	2015	107	0.177736249
485	a52	2016	2015	107	0.488930112
486	a52	2016	2015	107	0.127614216
487	a53	2016	2016	15	0.147324715
488	a53	2016	2016	15	0.115266045
489	a53	2016	2016	15	0.013921339
490	a53	2016	2016	15	0.229815315
491	a53	2016	2016	15	0.061875404
492	a53	2016	2016	15	0.093247792
493	a53	2016	2016	15	0.422858208
494	a54	2016	2016	12	0.378667574
495	a54	2016	2016	12	0.275617332
496	a54	2016	2016	12	1.224002086
497	a54	2016	2016	12	0.186512837
498	a54	2016	2016	12	1.442859863
499	a54	2016	2016	12	0.823732705
500	a54	2016	2016	12	0
501	a54	2016	2016	12	0
502	a55	2016	2016	64	0.552085435
503	a55	2016	2016	64	0.134530578
504	a55	2016	2016	64	0.390370568
505	a56	2016	2016	30	0.16925485
506	a56	2016	2016	30	0.284485992
507	a57	2016	2016	40	0.061112086
508	a57	2016	2016	40	0.013618081
509	a58	2016	2015	24	0.266626961
510	a58	2016	2015	23	0.585021021
511	a58	2016	2015	18	0.124137414
512	a58	2016	2015	16	0.015819056
513	a58	2016	2015	16	0.248172735
514	a58	2016	2015	16	0.178761987
515	a58	2016	2015	16	0.002129549
516	a59	2017	2017	17	0.91582077
517	a59	2017	2017	17	0.026404174
518	a59	2017	2017	17	0.228566885
519	a59	2017	2017	17	0.075985907
520	a59	2017	2017	17	0.296526097
521	a59	2017	2017	17	2.717528945
522	a60	2017	2017	30	1.0504492
523	a60	2017	2017	30	0.545212732
524	a60	2017	2017	29	0.025065451
525	a61	2017	2017	19	0.240523236
526	a61	2017	2017	17	0.011976191
527	a62	2017	2017	25	0.223148881
528	a62	2017	2017	25	0.144847334
529	a62	2017	2017	25	0.299531846
530	a62	2017	2017	25	0.243466205
531	a62	2017	2017	25	0.068263702
532	a62	2017	2017	25	0.138988432
533	a63	2017	2017	21	0.311885674
534	a63	2017	2017	21	0.865130898
535	a63	2017	2017	21	0.112158638
536	a64	2017	2017	60	0.621677361
537	a64	2017	2017	60	0.275427337
538	a64	2017	2017	60	0.09717981
539	a64	2017	2017	16	2.44856649
540	a64	2017	2017	16	1.691729269
541	a64	2017	2017	16	1.7917932
542	a64	2017	2017	60	0.485510572
543	a64	2017	2017	60	0.096848331
544	a64	2017	2017	60	0.510840325
545	a64	2017	2017	60	0.460806598
546	a64	2017	2017	24	0.639103498
547	a64	2017	2017	24	0.313698298
548	a64	2017	2017	24	1.166473087
549	a64	2017	2017	24	0.744486375
550	a65	2017	2017	15	0.079154386
551	a65	2017	2017	15	0.008950529
552	a65	2017	2017	17	0.03991539
553	a65	2017	2017	17	0.007456948
554	a65	2017	2017	6	0.183386292
555	a65	2017	2017	6	0.021160504
556	a65	2017	2017	6	0.010993445
557	a65	2017	2017	6	0.067605831
558	a65	2017	2017	6	0.016709832
559	a65	2017	2017	6	0.059358125
560	a65	2017	2017	6	0.103183629
561	a65	2017	2017	6	0.058138948
562	a66	2017	2016	11	0.222850328
563	a66	2017	2016	10	0.523863101
564	a66	2017	2016	36	0.276253377
565	a67	2017	2016	20	0.371561155
566	a67	2017	2016	20	0.099090747
567	a67	2017	2016	14	0.869397809
568	a68	2017	2017	12	0.141118924
569	a68	2017	2017	12	0.274141443
570	a68	2017	2017	12	0.023514942
571	a68	2017	2017	12	0.169248492
572	a69	2017	2017	18	0.270469724
573	a69	2017	2017	18	0.193413638
574	a69	2017	2017	18	0.094589141
575	a69	2017	2017	18	0.127142426
576	a69	2017	2017	18	1.996548687
577	a69	2017	2017	18	1.214163916
578	a69	2017	2017	18	0.49366727
579	a69	2017	2017	18	0.265705774
580	a69	2017	2017	17	0.462767674
581	a69	2017	2017	17	0.117837415
582	a69	2017	2017	17	0.075312398
583	a69	2017	2017	18	0.509741146
584	a69	2017	2017	17	0.917361132
585	a69	2017	2017	9	0.14432822
586	a69	2017	2017	9	0.002313036
587	a69	2017	2017	14	0.019498898
588	a69	2017	2017	14	0.082136519
589	a69	2017	2017	13	0.127680732
590	a69	2017	2017	13	0.258404983
591	a69	2017	2017	8	0.191449645
592	a70	2017	2017	35	0.089776214
593	a70	2017	2017	35	0.049597546
596	a70	2017	2017	19	0.157438248
597	a70	2017	2017	19	0.382996521
598	a71	2017	2017	752	0.717502133
599	a71	2017	2017	752	0.942683813
600	a71	2017	2017	200	0.80667001
601	a72	2018	2018	24	0.211126292
602	a72	2018	2018	24	0.209553818
603	a72	2018	2018	24	0.123408245
604	a72	2018	2018	24	0.033721915
605	a72	2018	2018	24	0.094999312
606	a72	2018	2018	24	0.189587748
607	a72	2018	2018	24	0.106058491
608	a72	2018	2018	24	0.001868211
609	a73	2018	2017	8	0.021883611
610	a73	2018	2017	8	0.147537669
611	a73	2018	2017	10	0.094028363
612	a73	2018	2017	10	0.022187784
613	a73	2018	2017	10	0.056854691
614	a73	2018	2017	10	0.072000961
615	a73	2018	2017	10	0.16532699
616	a73	2018	2017	10	0.323224877
617	a73	2018	2017	10	0.055264577
618	a73	2018	2017	10	0.620572668
619	a73	2018	2017	10	0.384670986
620	a73	2018	2017	10	0.2573359
621	a73	2018	2017	10	0.182329036
622	a73	2018	2017	10	0.490202673
623	a73	2018	2017	10	0.081923517
624	a73	2018	2017	10	0.076300866
625	a73	2018	2017	10	0.041042259
626	a73	2018	2017	10	0.224199325
627	a73	2018	2017	10	0.260276023
628	a73	2018	2017	10	0.173281644
629	a73	2018	2017	10	0.359990211
630	a73	2018	2017	10	0.205813888
631	a74	2018	2018	165	0.515297991
632	a74	2018	2018	165	0.441044459
633	a74	2018	2018	165	0.134179178
634	a74	2018	2018	53	0.215303804
635	a74	2018	2018	165	0.120627988
636	a74	2018	2018	9	0.079470199
637	a74	2018	2018	9	0.518584391
638	a75	2018	2018	29	0.100175554
639	a75	2018	2018	29	0.009048476
640	a75	2018	2018	29	0.254307694
641	a75	2018	2018	29	0.066273661
642	a76	2018	2018	9	0.137201781
643	a76	2018	2018	9	0.824161394
644	a76	2018	2018	9	0.060672562
645	a76	2018	2018	9	0.064531121
646	a76	2018	2018	9	0.365465284
647	a76	2018	2018	10	0.641191408
648	a77	2018	2018	19	1.339288319
649	a77	2018	2018	19	0.340261523
650	a77	2018	2018	19	0.614759525
651	a77	2018	2018	19	1.241713132
652	a78	2018	2018	137	0.023486811
653	a78	2018	2018	144	0.059991602
654	a78	2018	2018	118	0.13543535
655	a78	2018	2018	118	0.014461376
656	a78	2018	2018	66	0.066047361
657	a78	2018	2018	70	0.051804411
658	a78	2018	2018	58	0.078749046
659	a78	2018	2018	59	0.072938723
660	a78	2018	2018	71	1.392448227
661	a78	2018	2018	74	1.114889352
662	a78	2018	2018	60	1.357064723
663	a78	2018	2018	59	1.097586121
664	a79	2018	2018	13	0.07028395
665	a79	2018	2018	14	0.344543106
666	a79	2018	2018	13	0.52663731
667	a79	2018	2018	13	0.433637361
668	a79	2018	2018	13	1.014336794
669	a79	2018	2018	13	1.371676992
670	a79	2018	2018	13	0.282336157
671	a79	2018	2018	13	0.737889755
672	a79	2018	2018	13	1.095659323
673	a80	2018	2018	10	0
674	a80	2018	2018	10	0.050485035
675	a80	2018	2018	10	0.350621872
676	a80	2018	2018	10	0.0340203
677	a80	2018	2018	10	0.007769737
678	a80	2018	2018	10	0.051275399
679	a81	2018	2018	5	1.253358857
680	a81	2018	2018	5	0.75373603
681	a81	2018	2018	4	10.13380531
682	a81	2018	2018	5	0.267972638
683	a81	2018	2018	5	0.106103116
684	a81	2018	2018	4	0.599495879
685	a81	2018	2018	5	1.832550812
686	a81	2018	2018	5	0.644521901
687	a81	2018	2018	4	13.04113163
688	a81	2018	2018	5	1.04978241
689	a81	2018	2018	5	0.137234666
690	a81	2018	2018	4	11.97205771
691	a81	2018	2018	5	0.09190173
692	a81	2018	2018	5	0.285457574
693	a81	2018	2018	4	1.210643493
694	a81	2018	2018	5	0.028564738
695	a81	2018	2018	5	0.399809147
696	a81	2018	2018	4	0.379497614
697	a82	2018	2018	10	0.859643923
698	a82	2018	2018	10	0.380598007
699	a82	2018	2018	10	0.176447556
700	a82	2018	2018	10	0.050495839
701	a82	2018	2018	10	0.038364136
702	a82	2018	2018	16	0.131782012
703	a82	2018	2018	16	0
704	a82	2018	2018	16	0.056346744
705	a82	2018	2018	16	0.051300433
706	a82	2018	2018	16	0.07756607
707	a82	2018	2018	16	0.04347401
708	a82	2018	2018	10	0.753786049
709	a82	2018	2018	10	0.301742441
710	a82	2018	2018	10	0.13950869
711	a82	2018	2018	10	0.165623761
712	a82	2018	2018	10	0.14489368
713	a82	2018	2018	10	0.147449226
714	a82	2018	2018	10	0.167991488
715	a82	2018	2018	10	0.325725125
716	a83	2018	2018	6	0.050739524
717	a83	2018	2018	12	0.261116608
718	a84	2018	2018	30	0
719	a84	2018	2018	11	0.032152489
720	a84	2018	2018	16	0.290147911
721	a84	2018	2018	23	0.24327158
722	a85	2018	2018	41	0.052217493
723	a85	2018	2018	41	0.043390755
724	a85	2018	2018	41	0.155149182
725	a86	2018	2018	6	1.424158967
726	a87	2018	2018	36	0.130734188
727	a87	2018	2018	36	0.513762483
728	a87	2018	2018	36	0.153542592
729	a87	2018	2018	36	0.158313017
730	a87	2018	2018	36	0.258307464
731	a87	2018	2018	36	0.258307464
732	a87	2018	2018	36	0.006792845
733	a87	2018	2018	36	0.224116787
734	a87	2018	2018	36	0.542054361
735	a87	2018	2018	36	0.101742522
736	a87	2018	2018	36	0.392837985
737	a87	2018	2018	36	0.048679673
738	a87	2018	2018	36	0.118657544
739	a87	2018	2018	36	0.042778122
740	a87	2018	2018	36	0.17488921
741	a87	2018	2018	36	0.114026234
742	a87	2018	2018	36	0.137394215
743	a87	2018	2018	36	0.034882943
744	a87	2018	2018	36	0.235166624
745	a87	2018	2018	36	0.072612533
746	a87	2018	2018	36	0.102835074
747	a87	2018	2018	36	0
748	a87	2018	2018	36	0.130053128
749	a87	2018	2018	36	0.03948247
750	a87	2018	2018	36	0.305795986
751	a87	2018	2018	36	0.062620776
752	a87	2018	2018	36	0.369285452
753	a87	2018	2018	36	0.079232663
754	a87	2018	2018	36	0.128007459
755	a87	2018	2018	36	0.066295289
756	a87	2018	2018	36	0.05155781
757	a87	2018	2018	36	0.011229764
758	a87	2018	2018	36	0.100979044
759	a87	2018	2018	36	0.083044811
760	a87	2018	2018	36	0.184076456
761	a87	2018	2018	36	0.061050877
762	a87	2018	2018	36	0.00606407
763	a87	2018	2018	36	0.035631901
764	a87	2018	2018	36	0.175128374
765	a87	2018	2018	36	0.237448482
766	a88	2018	2018	15	0.236388778
767	a88	2018	2018	15	0.434214521
768	a88	2018	2018	15	0.691902419
769	a88	2018	2018	15	0.84247617
770	a88	2018	2018	15	0.162381179
771	a88	2018	2018	15	0.496102382
772	a88	2018	2018	15	0.185376327
773	a88	2018	2018	15	0.531245091
774	a88	2018	2018	15	0.332825924
775	a88	2018	2018	15	1.528085076
776	a89	2019	2019	8	0.101955015
777	a89	2019	2019	8	0.36772478
778	a89	2019	2019	8	0.062865238
779	a89	2019	2019	8	0.182321557
780	a90	2019	2019	66	0.102118844
781	a90	2019	2019	66	0.115531599
782	a90	2019	2019	66	0.172850688
783	a90	2019	2019	66	0.143079524
784	a90	2019	2019	66	0.080077624
785	a90	2019	2019	66	0.294104702
786	a90	2019	2019	66	0.378140265
787	a90	2019	2019	66	0.333010029
788	a90	2019	2019	66	0.280195019
789	a90	2019	2019	66	0.102118844
790	a90	2019	2019	66	0.082914948
791	a90	2019	2019	66	0.10953568
792	a90	2019	2019	66	0.112546023
793	a90	2019	2019	66	0.065304229
794	a90	2019	2019	66	0.130669812
795	a90	2019	2019	66	0.226165117
796	a90	2019	2019	66	0.202956901
797	a90	2019	2019	66	0.246598294
798	a90	2019	2019	66	0.053515953
799	a90	2019	2019	66	0.048660932
800	a90	2019	2019	66	0.025979652
801	a90	2019	2019	66	0.049402319
802	a90	2019	2019	66	0.038159438
803	a90	2019	2019	66	0.01821544
804	a90	2019	2019	66	0.049445705
805	a90	2019	2019	66	0.009363364
806	a90	2019	2019	66	0.018125393
807	a90	2019	2019	66	0.094938041
808	a90	2019	2019	66	0.027337729
809	a90	2019	2019	66	0.022675963
810	a90	2019	2019	66	0.015594551
811	a90	2019	2019	66	0.004294924
812	a90	2019	2019	66	0.009604464
813	a90	2019	2019	66	0.044133236
814	a90	2019	2019	66	0.027015786
815	a90	2019	2019	66	0.013623305
816	a91	2019	2019	40	0.118762948
817	a91	2019	2019	41	0.154729401
818	a91	2019	2019	42	0.594367135
